# Supplementary material for: Monitoring the death of single BaF3 cells under plasmonic photothermal heating induced by ultrasmall gold nanorods
Source: Royal Society of Chemistry journal article supplement (doi:10.1039/c8tb03135e), 2019-01-01
Supplement: c8tb03135e1.pdf [file c8tb03135e1.pdf]

Supporting Information for

# Monitoring the Death of Single BaF3 Cells Under Plasmonic Photothermal Heating Induced by Ultrasmall Goldnanorods

Lisa Prisner\*, Phillip Witthöft\*, Lan Vi Nguyen, Thomas Tsangas, Tobias Gefken,  
Florentine Klaus, Christian Strelow, Tobias Kipp, and Alf Mews

Institute of Physical Chemistry, University of Hamburg, Grindelallee 117, D-20146 Hamburg,  
Germany

\*These authors contributed equally to this work

## Toxicity Test for Gold Nanorods

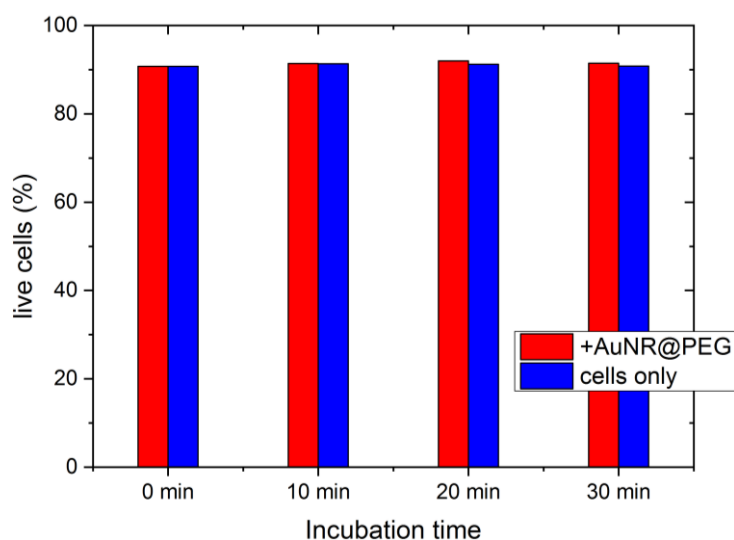

Figure S1: Toxicity test of PEGylated gold nanorods on cells. Cells were incubated with PEGylated gold nanorods ( $1 \sim \text{nM}$  nanorods,  $37^\circ\text{C}$ ,  $5\% \text{CO}_2$ ) for up to 30 minutes. Every 10 minutes the cell viability was analyzed via cell exclusion assay using trypan blue. Even after 30 minute incubation with gold nanorods, no decrease in cell viability compared to before the incubation is observed.

**Micrographs being the Basis for the Analysis Presented in Figure 4 (a)**

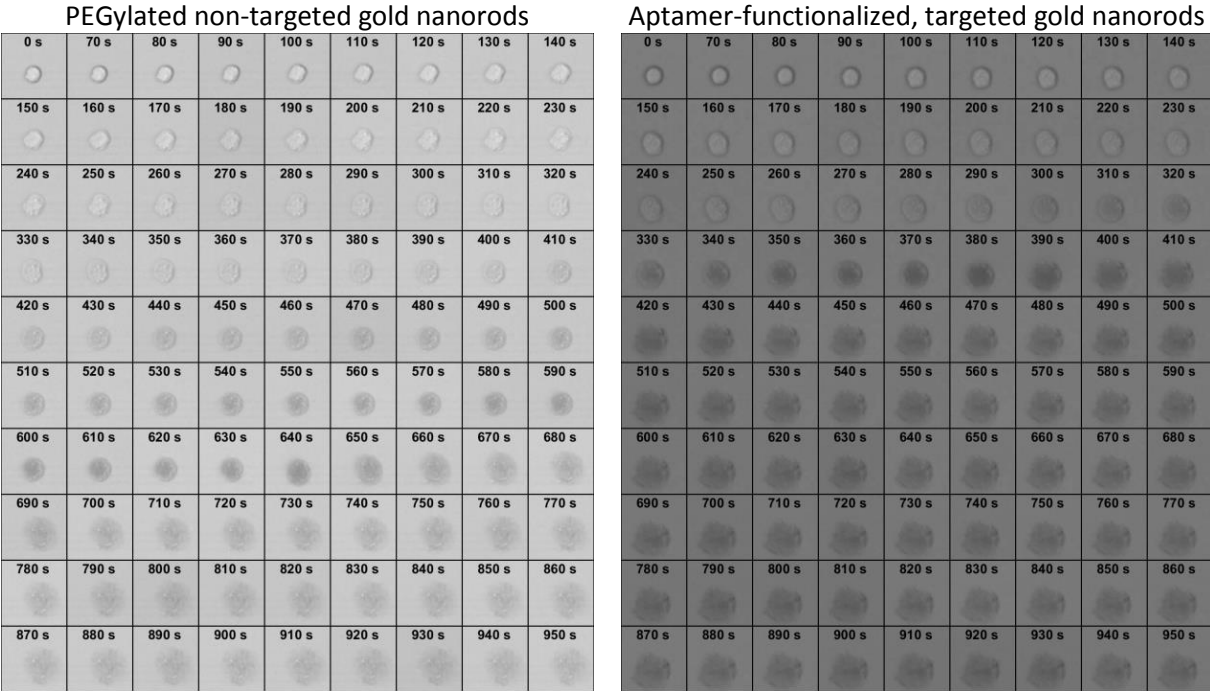

Figure S2: Observation of the plasmonic photothermal effect of non-targeted gold nanorods (left) and targeted gold nanorods (right) on a single cell irradiated at 690~nm with 22Wcm<sup>-2</sup> for 60 s, after incubation with gold nanorods (1~nM gold nanorodsM, 30 min, 37°C, 5% CO<sub>2</sub>).
